# Supplementary material
Source: publisher figshare collection journal article supplement (https://acs.figshare.com/ndownloader/files/4160377)
Supplement: Supplementary file 1 [file 4160377]

  
data_ic15068 
  
_audit_creation_method            SHELXL-97 
_chemical_name_systematic 
; 
 ? 
; 
_chemical_name_common             ? 
_chemical_melting_point           ? 
_chemical_formula_moiety          ? 
_chemical_formula_sum 
 'C29 H19 Fe2 O5 P S2' 
_chemical_formula_weight          654.23 
  
loop_ 
 _atom_type_symbol 
 _atom_type_description 
 _atom_type_scat_dispersion_real 
 _atom_type_scat_dispersion_imag 
 _atom_type_scat_source 
 'C'  'C'   0.0033   0.0016 
 'International Tables Vol C Tables 4.2.6.8 and 6.1.1.4' 
 'H'  'H'   0.0000   0.0000 
 'International Tables Vol C Tables 4.2.6.8 and 6.1.1.4' 
 'O'  'O'   0.0106   0.0060 
 'International Tables Vol C Tables 4.2.6.8 and 6.1.1.4' 
 'P'  'P'   0.1023   0.0942 
 'International Tables Vol C Tables 4.2.6.8 and 6.1.1.4' 
 'S'  'S'   0.1246   0.1234 
 'International Tables Vol C Tables 4.2.6.8 and 6.1.1.4' 
 'Fe'  'Fe'   0.3463   0.8444 
 'International Tables Vol C Tables 4.2.6.8 and 6.1.1.4' 
  
_symmetry_cell_setting            Triclinic 
_symmetry_space_group_name_H-M    P-1 
  
loop_ 
 _symmetry_equiv_pos_as_xyz 
 'x, y, z' 
 '-x, -y, -z' 
  
_cell_length_a                    10.6019(6) 
_cell_length_b                    12.1058(7) 
_cell_length_c                    13.0037(7) 
_cell_angle_alpha                 64.5114(10) 
_cell_angle_beta                  66.7002(11) 
_cell_angle_gamma                 68.1529(11) 
_cell_volume                      1341.99(13) 
_cell_formula_units_Z             2 
_cell_measurement_temperature     150(2) 
_cell_measurement_reflns_used     6495 
_cell_measurement_theta_min       2.16 
_cell_measurement_theta_max       27.36 
  
_exptl_crystal_description        block 
_exptl_crystal_colour             red 
_exptl_crystal_size_max           0.40 
_exptl_crystal_size_mid           0.20 
_exptl_crystal_size_min           0.15 
_exptl_crystal_density_meas       not_measured 
_exptl_crystal_density_diffrn     1.619 
_exptl_crystal_density_method     'not measured' 
_exptl_crystal_F_000              664 
_exptl_absorpt_coefficient_mu     1.336 
_exptl_absorpt_correction_type    multi-scan 
_exptl_absorpt_correction_T_min   0.6171 
_exptl_absorpt_correction_T_max   0.8248 
_exptl_absorpt_process_details    ? 
  
_exptl_special_details 
; 
 ? 
; 
  
_diffrn_ambient_temperature       150(2) 
_diffrn_radiation_wavelength      0.71073 
_diffrn_radiation_type            MoK\a 
_diffrn_radiation_source          'fine-focus sealed tube' 
_diffrn_radiation_monochromator   graphite 
_diffrn_measurement_device_type   'BRUKER SMART APEXCCD area detector' 
_diffrn_measurement_method        'omega scans' 
_diffrn_detector_area_resol_mean  ? 
_diffrn_standards_number          ? 
_diffrn_standards_interval_count  ? 
_diffrn_standards_interval_time   ? 
_diffrn_standards_decay_%         ? 
_diffrn_reflns_number             17816 
_diffrn_reflns_av_R_equivalents   0.0280 
_diffrn_reflns_av_sigmaI/netI     0.0327 
_diffrn_reflns_limit_h_min        -13 
_diffrn_reflns_limit_h_max        13 
_diffrn_reflns_limit_k_min        -15 
_diffrn_reflns_limit_k_max        15 
_diffrn_reflns_limit_l_min        -16 
_diffrn_reflns_limit_l_max        16 
_diffrn_reflns_theta_min          1.81 
_diffrn_reflns_theta_max          27.50 
_reflns_number_total              6150 
_reflns_number_gt                 5548 
_reflns_threshold_expression      >2sigma(I) 
  
_computing_data_collection        'Bruker SMART' 
_computing_cell_refinement        'Bruker SAINT' 
_computing_data_reduction         'Bruker SAINT' 
_computing_structure_solution     'SHELXS-97 (Sheldrick, 1990)' 
_computing_structure_refinement   'SHELXL-97 (Sheldrick, 1997)' 
_computing_molecular_graphics     'Bruker SHELXTL' 
_computing_publication_material   'Bruker SHELXTL' 
  
_refine_special_details 
; 
 Refinement of F^2^ against ALL reflections.  The weighted R-factor wR and 
 goodness of fit S are based on F^2^, conventional R-factors R are based 
 on F, with F set to zero for negative F^2^. The threshold expression of 
 F^2^ > 2sigma(F^2^) is used only for calculating R-factors(gt) etc. and is 
 not relevant to the choice of reflections for refinement.  R-factors based 
 on F^2^ are statistically about twice as large as those based on F, and R- 
 factors based on ALL data will be even larger. 
; 
  
_refine_ls_structure_factor_coef  Fsqd 
_refine_ls_matrix_type            full 
_refine_ls_weighting_scheme       calc 
_refine_ls_weighting_details 
 'calc w=1/[\s^2^(Fo^2^)+(0.0333P)^2^+0.5481P] where P=(Fo^2^+2Fc^2^)/3' 
_atom_sites_solution_primary      direct 
_atom_sites_solution_secondary    difmap 
_atom_sites_solution_hydrogens    geom 
_refine_ls_hydrogen_treatment     constr 
_refine_ls_extinction_method      none 
_refine_ls_extinction_coef        ? 
_refine_ls_number_reflns          6150 
_refine_ls_number_parameters      352 
_refine_ls_number_restraints      0 
_refine_ls_R_factor_all           0.0338 
_refine_ls_R_factor_gt            0.0296 
_refine_ls_wR_factor_ref          0.0718 
_refine_ls_wR_factor_gt           0.0695 
_refine_ls_goodness_of_fit_ref    1.028 
_refine_ls_restrained_S_all       1.028 
_refine_ls_shift/su_max           0.001 
_refine_ls_shift/su_mean          0.000 
  
loop_ 
 _atom_site_label 
 _atom_site_type_symbol 
 _atom_site_fract_x 
 _atom_site_fract_y 
 _atom_site_fract_z 
 _atom_site_U_iso_or_equiv 
 _atom_site_adp_type 
 _atom_site_occupancy 
 _atom_site_symmetry_multiplicity 
 _atom_site_calc_flag 
 _atom_site_refinement_flags 
 _atom_site_disorder_assembly 
 _atom_site_disorder_group 
Fe1 Fe -0.07589(3) 0.23670(2) 0.19381(2) 0.01555(7) Uani 1 1 d . . . 
Fe2 Fe -0.26686(3) 0.31762(2) 0.35096(2) 0.01850(7) Uani 1 1 d . . . 
S1 S -0.07321(5) 0.15701(4) 0.38599(4) 0.01787(10) Uani 1 1 d . . . 
S2 S -0.09131(5) 0.41713(4) 0.22064(4) 0.01836(10) Uani 1 1 d . . . 
P1 P 0.14960(5) 0.15064(4) 0.10841(4) 0.01577(10) Uani 1 1 d . . . 
C1 C -0.1340(2) 0.33107(18) 0.06492(17) 0.0227(4) Uani 1 1 d . . . 
C2 C -0.14307(19) 0.11318(18) 0.21410(18) 0.0226(4) Uani 1 1 d . . . 
C3 C -0.3846(2) 0.42242(19) 0.26206(19) 0.0251(4) Uani 1 1 d . . . 
C4 C -0.3747(2) 0.2060(2) 0.42915(18) 0.0268(4) Uani 1 1 d . . . 
C5 C -0.31918(19) 0.39205(18) 0.46064(17) 0.0233(4) Uani 1 1 d . . . 
C6 C 0.03355(19) 0.23959(17) 0.38859(16) 0.0181(4) Uani 1 1 d . . . 
C7 C 0.1251(2) 0.18617(18) 0.45822(16) 0.0221(4) Uani 1 1 d . . . 
H7 H 0.1413 0.0988 0.5031 0.027 Uiso 1 1 calc R . . 
C8 C 0.1931(2) 0.2626(2) 0.46144(17) 0.0270(4) Uani 1 1 d . . . 
H8 H 0.2574 0.2270 0.5081 0.032 Uiso 1 1 calc R . . 
C9 C 0.1681(2) 0.3899(2) 0.39740(18) 0.0279(4) Uani 1 1 d . . . 
H9 H 0.2110 0.4420 0.4039 0.034 Uiso 1 1 calc R . . 
C10 C 0.0800(2) 0.44267(19) 0.32309(18) 0.0240(4) Uani 1 1 d . . . 
H10 H 0.0646 0.5298 0.2773 0.029 Uiso 1 1 calc R . . 
C11 C 0.01581(18) 0.36558(17) 0.31763(16) 0.0186(4) Uani 1 1 d . . . 
C12 C 0.18821(19) -0.02032(17) 0.14418(16) 0.0187(4) Uani 1 1 d . . . 
C13 C 0.2679(2) -0.07814(18) 0.05861(18) 0.0253(4) Uani 1 1 d . . . 
H13 H 0.3033 -0.0285 -0.0212 0.030 Uiso 1 1 calc R . . 
C14 C 0.2961(2) -0.20803(19) 0.08890(19) 0.0309(5) Uani 1 1 d . . . 
H14 H 0.3508 -0.2468 0.0298 0.037 Uiso 1 1 calc R . . 
C15 C 0.2452(2) -0.28095(18) 0.20443(19) 0.0266(4) Uani 1 1 d . . . 
H15 H 0.2647 -0.3698 0.2249 0.032 Uiso 1 1 calc R . . 
C16 C 0.1660(2) -0.22481(18) 0.29028(18) 0.0255(4) Uani 1 1 d . . . 
H16 H 0.1308 -0.2751 0.3699 0.031 Uiso 1 1 calc R . . 
C17 C 0.13758(19) -0.09562(17) 0.26074(17) 0.0224(4) Uani 1 1 d . . . 
H17 H 0.0830 -0.0576 0.3204 0.027 Uiso 1 1 calc R . . 
C18 C 0.20907(19) 0.20558(16) -0.05387(16) 0.0179(4) Uani 1 1 d . . . 
C19 C 0.1253(2) 0.20835(18) -0.11567(17) 0.0224(4) Uani 1 1 d . . . 
H19 H 0.0375 0.1853 -0.0732 0.027 Uiso 1 1 calc R . . 
C20 C 0.1693(2) 0.24441(18) -0.23839(18) 0.0267(4) Uani 1 1 d . . . 
H20 H 0.1120 0.2456 -0.2797 0.032 Uiso 1 1 calc R . . 
C21 C 0.2966(2) 0.27872(19) -0.30085(18) 0.0287(4) Uani 1 1 d . . . 
H21 H 0.3259 0.3048 -0.3851 0.034 Uiso 1 1 calc R . . 
C22 C 0.3811(2) 0.27511(19) -0.24092(18) 0.0284(4) Uani 1 1 d . . . 
H22 H 0.4689 0.2979 -0.2840 0.034 Uiso 1 1 calc R . . 
C23 C 0.3380(2) 0.23829(18) -0.11779(17) 0.0233(4) Uani 1 1 d . . . 
H23 H 0.3969 0.2354 -0.0770 0.028 Uiso 1 1 calc R . . 
C24 C 0.28487(18) 0.16954(17) 0.14837(16) 0.0184(4) Uani 1 1 d . . . 
C25 C 0.37918(19) 0.06778(18) 0.20496(17) 0.0227(4) Uani 1 1 d . . . 
H25 H 0.3750 -0.0161 0.2241 0.027 Uiso 1 1 calc R . . 
C26 C 0.4795(2) 0.0894(2) 0.23339(18) 0.0275(4) Uani 1 1 d . . . 
H26 H 0.5435 0.0202 0.2723 0.033 Uiso 1 1 calc R . . 
C27 C 0.4861(2) 0.2112(2) 0.20530(18) 0.0280(4) Uani 1 1 d . . . 
H27 H 0.5550 0.2253 0.2247 0.034 Uiso 1 1 calc R . . 
C28 C 0.3931(2) 0.3127(2) 0.14898(18) 0.0257(4) Uani 1 1 d . . . 
H28 H 0.3984 0.3964 0.1294 0.031 Uiso 1 1 calc R . . 
C29 C 0.29215(19) 0.29174(18) 0.12125(17) 0.0216(4) Uani 1 1 d . . . 
H29 H 0.2275 0.3614 0.0834 0.026 Uiso 1 1 calc R . . 
O1 O -0.17814(17) 0.39348(14) -0.01453(13) 0.0348(4) Uani 1 1 d . . . 
O2 O -0.18986(16) 0.03444(14) 0.22899(16) 0.0389(4) Uani 1 1 d . . . 
O3 O -0.45836(17) 0.48827(15) 0.20421(15) 0.0380(4) Uani 1 1 d . . . 
O4 O -0.44186(17) 0.13425(16) 0.47955(15) 0.0426(4) Uani 1 1 d . . . 
O5 O -0.35213(16) 0.44256(14) 0.52680(13) 0.0322(3) Uani 1 1 d . . . 
  
loop_ 
 _atom_site_aniso_label 
 _atom_site_aniso_U_11 
 _atom_site_aniso_U_22 
 _atom_site_aniso_U_33 
 _atom_site_aniso_U_23 
 _atom_site_aniso_U_13 
 _atom_site_aniso_U_12 
Fe1 0.01536(13) 0.01482(13) 0.01716(13) -0.00582(10) -0.00554(10) -0.00276(10) 
Fe2 0.01491(13) 0.01934(14) 0.02075(14) -0.00835(11) -0.00400(10) -0.00273(10) 
S1 0.0192(2) 0.0160(2) 0.0180(2) -0.00423(17) -0.00597(17) -0.00482(17) 
S2 0.0196(2) 0.0153(2) 0.0205(2) -0.00509(17) -0.00735(18) -0.00365(17) 
P1 0.0157(2) 0.0157(2) 0.0155(2) -0.00489(17) -0.00438(17) -0.00382(17) 
C1 0.0228(9) 0.0214(9) 0.0262(10) -0.0109(8) -0.0084(8) -0.0025(7) 
C2 0.0170(9) 0.0232(10) 0.0292(10) -0.0120(8) -0.0087(8) -0.0001(7) 
C3 0.0211(9) 0.0242(10) 0.0332(11) -0.0133(9) -0.0068(8) -0.0051(8) 
C4 0.0195(9) 0.0310(11) 0.0288(11) -0.0109(9) -0.0062(8) -0.0045(8) 
C5 0.0173(9) 0.0240(10) 0.0243(10) -0.0075(8) -0.0054(8) -0.0018(7) 
C6 0.0169(8) 0.0211(9) 0.0177(9) -0.0099(7) -0.0025(7) -0.0047(7) 
C7 0.0216(9) 0.0254(10) 0.0175(9) -0.0065(8) -0.0049(7) -0.0052(8) 
C8 0.0231(10) 0.0416(12) 0.0209(10) -0.0130(9) -0.0068(8) -0.0089(9) 
C9 0.0293(11) 0.0371(12) 0.0277(11) -0.0160(9) -0.0062(9) -0.0145(9) 
C10 0.0262(10) 0.0228(10) 0.0260(10) -0.0102(8) -0.0058(8) -0.0081(8) 
C11 0.0165(8) 0.0224(9) 0.0173(9) -0.0095(7) -0.0033(7) -0.0031(7) 
C12 0.0165(8) 0.0169(9) 0.0220(9) -0.0058(7) -0.0060(7) -0.0035(7) 
C13 0.0274(10) 0.0218(9) 0.0223(10) -0.0080(8) -0.0010(8) -0.0069(8) 
C14 0.0322(11) 0.0237(10) 0.0326(11) -0.0156(9) -0.0008(9) -0.0040(9) 
C15 0.0224(10) 0.0162(9) 0.0376(12) -0.0092(8) -0.0059(9) -0.0036(7) 
C16 0.0234(10) 0.0204(9) 0.0240(10) -0.0018(8) -0.0044(8) -0.0053(8) 
C17 0.0211(9) 0.0202(9) 0.0221(9) -0.0081(8) -0.0042(8) -0.0016(7) 
C18 0.0210(9) 0.0143(8) 0.0166(8) -0.0056(7) -0.0042(7) -0.0031(7) 
C19 0.0224(9) 0.0226(9) 0.0239(10) -0.0099(8) -0.0073(8) -0.0037(7) 
C20 0.0338(11) 0.0237(10) 0.0258(10) -0.0114(8) -0.0127(9) -0.0021(8) 
C21 0.0439(12) 0.0248(10) 0.0168(9) -0.0070(8) -0.0060(9) -0.0102(9) 
C22 0.0318(11) 0.0300(11) 0.0213(10) -0.0088(8) 0.0015(8) -0.0148(9) 
C23 0.0253(10) 0.0247(10) 0.0220(10) -0.0083(8) -0.0055(8) -0.0087(8) 
C24 0.0157(8) 0.0238(9) 0.0168(9) -0.0089(7) -0.0031(7) -0.0050(7) 
C25 0.0210(9) 0.0228(9) 0.0221(9) -0.0059(8) -0.0066(8) -0.0044(7) 
C26 0.0208(9) 0.0352(11) 0.0246(10) -0.0077(9) -0.0103(8) -0.0031(8) 
C27 0.0215(10) 0.0415(12) 0.0285(11) -0.0164(9) -0.0072(8) -0.0098(9) 
C28 0.0227(10) 0.0308(11) 0.0277(10) -0.0147(9) -0.0029(8) -0.0096(8) 
C29 0.0190(9) 0.0225(9) 0.0236(10) -0.0098(8) -0.0056(7) -0.0034(7) 
O1 0.0453(9) 0.0281(8) 0.0314(8) -0.0073(7) -0.0241(7) 0.0017(7) 
O2 0.0300(8) 0.0290(8) 0.0675(12) -0.0198(8) -0.0175(8) -0.0089(7) 
O3 0.0345(9) 0.0329(8) 0.0520(10) -0.0139(8) -0.0275(8) 0.0025(7) 
O4 0.0363(9) 0.0468(10) 0.0425(10) -0.0051(8) -0.0063(8) -0.0246(8) 
O5 0.0325(8) 0.0360(8) 0.0299(8) -0.0182(7) -0.0076(6) -0.0028(7) 
  
_geom_special_details 
; 
 All esds (except the esd in the dihedral angle between two l.s. planes) 
 are estimated using the full covariance matrix.  The cell esds are taken 
 into account individually in the estimation of esds in distances, angles 
 and torsion angles; correlations between esds in cell parameters are only 
 used when they are defined by crystal symmetry.  An approximate (isotropic) 
 treatment of cell esds is used for estimating esds involving l.s. planes. 
; 
  
loop_ 
 _geom_bond_atom_site_label_1 
 _geom_bond_atom_site_label_2 
 _geom_bond_distance 
 _geom_bond_site_symmetry_2 
 _geom_bond_publ_flag 
Fe1 C2 1.7655(19) . ? 
Fe1 C1 1.772(2) . ? 
Fe1 P1 2.2530(5) . ? 
Fe1 S1 2.2667(5) . ? 
Fe1 S2 2.2945(5) . ? 
Fe1 Fe2 2.4917(4) . ? 
Fe2 C3 1.790(2) . ? 
Fe2 C4 1.793(2) . ? 
Fe2 C5 1.806(2) . ? 
Fe2 S2 2.2811(5) . ? 
Fe2 S1 2.2824(5) . ? 
S1 C6 1.7841(18) . ? 
S2 C11 1.7883(18) . ? 
P1 C24 1.8207(18) . ? 
P1 C18 1.8289(18) . ? 
P1 C12 1.8327(18) . ? 
C1 O1 1.142(2) . ? 
C2 O2 1.144(2) . ? 
C3 O3 1.140(2) . ? 
C4 O4 1.137(2) . ? 
C5 O5 1.137(2) . ? 
C6 C7 1.380(3) . ? 
C6 C11 1.388(3) . ? 
C7 C8 1.390(3) . ? 
C8 C9 1.380(3) . ? 
C9 C10 1.397(3) . ? 
C10 C11 1.381(3) . ? 
C12 C13 1.389(3) . ? 
C12 C17 1.396(3) . ? 
C13 C14 1.388(3) . ? 
C14 C15 1.378(3) . ? 
C15 C16 1.378(3) . ? 
C16 C17 1.381(3) . ? 
C18 C23 1.392(3) . ? 
C18 C19 1.398(3) . ? 
C19 C20 1.385(3) . ? 
C20 C21 1.383(3) . ? 
C21 C22 1.381(3) . ? 
C22 C23 1.389(3) . ? 
C24 C29 1.390(3) . ? 
C24 C25 1.394(3) . ? 
C25 C26 1.392(3) . ? 
C26 C27 1.380(3) . ? 
C27 C28 1.384(3) . ? 
C28 C29 1.388(3) . ? 
  
loop_ 
 _geom_angle_atom_site_label_1 
 _geom_angle_atom_site_label_2 
 _geom_angle_atom_site_label_3 
 _geom_angle 
 _geom_angle_site_symmetry_1 
 _geom_angle_site_symmetry_3 
 _geom_angle_publ_flag 
C2 Fe1 C1 91.01(9) . . ? 
C2 Fe1 P1 94.81(6) . . ? 
C1 Fe1 P1 99.46(6) . . ? 
C2 Fe1 S1 91.39(7) . . ? 
C1 Fe1 S1 160.19(6) . . ? 
P1 Fe1 S1 99.924(19) . . ? 
C2 Fe1 S2 153.89(6) . . ? 
C1 Fe1 S2 89.15(6) . . ? 
P1 Fe1 S2 110.919(19) . . ? 
S1 Fe1 S2 80.164(18) . . ? 
C2 Fe1 Fe2 97.94(6) . . ? 
C1 Fe1 Fe2 103.11(6) . . ? 
P1 Fe1 Fe2 153.784(17) . . ? 
S1 Fe1 Fe2 57.092(14) . . ? 
S2 Fe1 Fe2 56.748(14) . . ? 
C3 Fe2 C4 92.28(9) . . ? 
C3 Fe2 C5 100.94(9) . . ? 
C4 Fe2 C5 99.62(9) . . ? 
C3 Fe2 S2 90.77(6) . . ? 
C4 Fe2 S2 162.45(7) . . ? 
C5 Fe2 S2 96.75(6) . . ? 
C3 Fe2 S1 152.71(7) . . ? 
C4 Fe2 S1 89.40(7) . . ? 
C5 Fe2 S1 105.62(6) . . ? 
S2 Fe2 S1 80.115(18) . . ? 
C3 Fe2 Fe1 96.97(7) . . ? 
C4 Fe2 Fe1 105.20(7) . . ? 
C5 Fe2 Fe1 148.63(6) . . ? 
S2 Fe2 Fe1 57.263(14) . . ? 
S1 Fe2 Fe1 56.486(14) . . ? 
C6 S1 Fe1 103.39(6) . . ? 
C6 S1 Fe2 100.46(6) . . ? 
Fe1 S1 Fe2 66.422(15) . . ? 
C11 S2 Fe2 98.14(6) . . ? 
C11 S2 Fe1 104.38(6) . . ? 
Fe2 S2 Fe1 65.989(15) . . ? 
C24 P1 C18 103.16(8) . . ? 
C24 P1 C12 103.58(8) . . ? 
C18 P1 C12 102.01(8) . . ? 
C24 P1 Fe1 115.71(6) . . ? 
C18 P1 Fe1 116.85(6) . . ? 
C12 P1 Fe1 113.69(6) . . ? 
O1 C1 Fe1 176.57(18) . . ? 
O2 C2 Fe1 178.24(18) . . ? 
O3 C3 Fe2 179.0(2) . . ? 
O4 C4 Fe2 179.1(2) . . ? 
O5 C5 Fe2 177.78(18) . . ? 
C7 C6 C11 120.74(17) . . ? 
C7 C6 S1 123.81(14) . . ? 
C11 C6 S1 115.42(13) . . ? 
C6 C7 C8 118.78(18) . . ? 
C9 C8 C7 120.56(18) . . ? 
C8 C9 C10 120.51(18) . . ? 
C11 C10 C9 118.64(18) . . ? 
C10 C11 C6 120.52(17) . . ? 
C10 C11 S2 123.84(15) . . ? 
C6 C11 S2 115.64(13) . . ? 
C13 C12 C17 118.55(17) . . ? 
C13 C12 P1 121.92(14) . . ? 
C17 C12 P1 119.53(14) . . ? 
C14 C13 C12 120.45(18) . . ? 
C15 C14 C13 120.23(19) . . ? 
C14 C15 C16 119.93(18) . . ? 
C15 C16 C17 120.12(18) . . ? 
C16 C17 C12 120.71(18) . . ? 
C23 C18 C19 118.83(17) . . ? 
C23 C18 P1 122.42(14) . . ? 
C19 C18 P1 118.66(14) . . ? 
C20 C19 C18 120.48(18) . . ? 
C21 C20 C19 120.06(18) . . ? 
C22 C21 C20 120.08(18) . . ? 
C21 C22 C23 120.18(19) . . ? 
C22 C23 C18 120.37(18) . . ? 
C29 C24 C25 119.39(17) . . ? 
C29 C24 P1 117.63(14) . . ? 
C25 C24 P1 122.98(14) . . ? 
C26 C25 C24 119.81(18) . . ? 
C27 C26 C25 120.22(18) . . ? 
C26 C27 C28 120.37(18) . . ? 
C27 C28 C29 119.67(19) . . ? 
C28 C29 C24 120.53(18) . . ? 
  
_diffrn_measured_fraction_theta_max    0.998 
_diffrn_reflns_theta_full              27.50 
_diffrn_measured_fraction_theta_full   0.998 
_refine_diff_density_max    0.396 
_refine_diff_density_min   -0.261 
_refine_diff_density_rms    0.062 
